# Supplementary material for: Rapid Detection of Carbapenem Resistance in Acinetobacter baumannii Using Matrix-Assisted Laser Desorption Ionization-Time of Flight Mass Spectrometry
Source: PubMed Central journal article supplement (PMC3280980; doi:10.1371/journal.pone.0031676), 2012-02-16

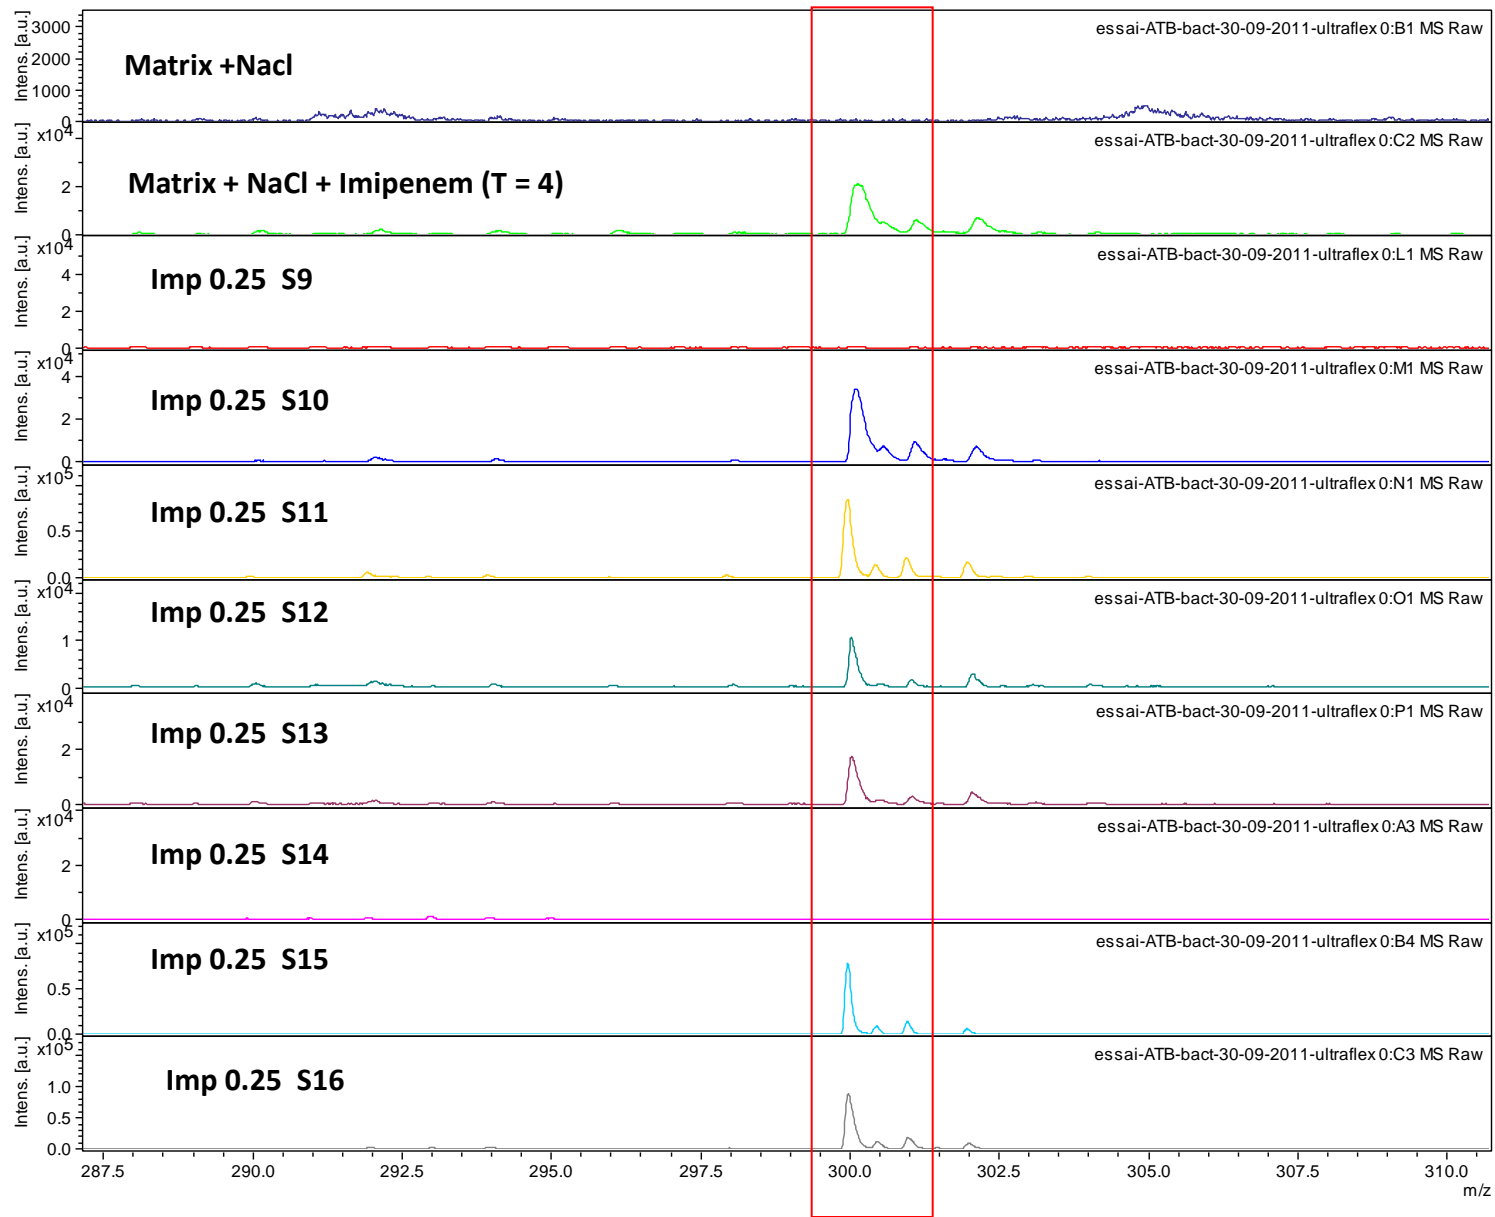

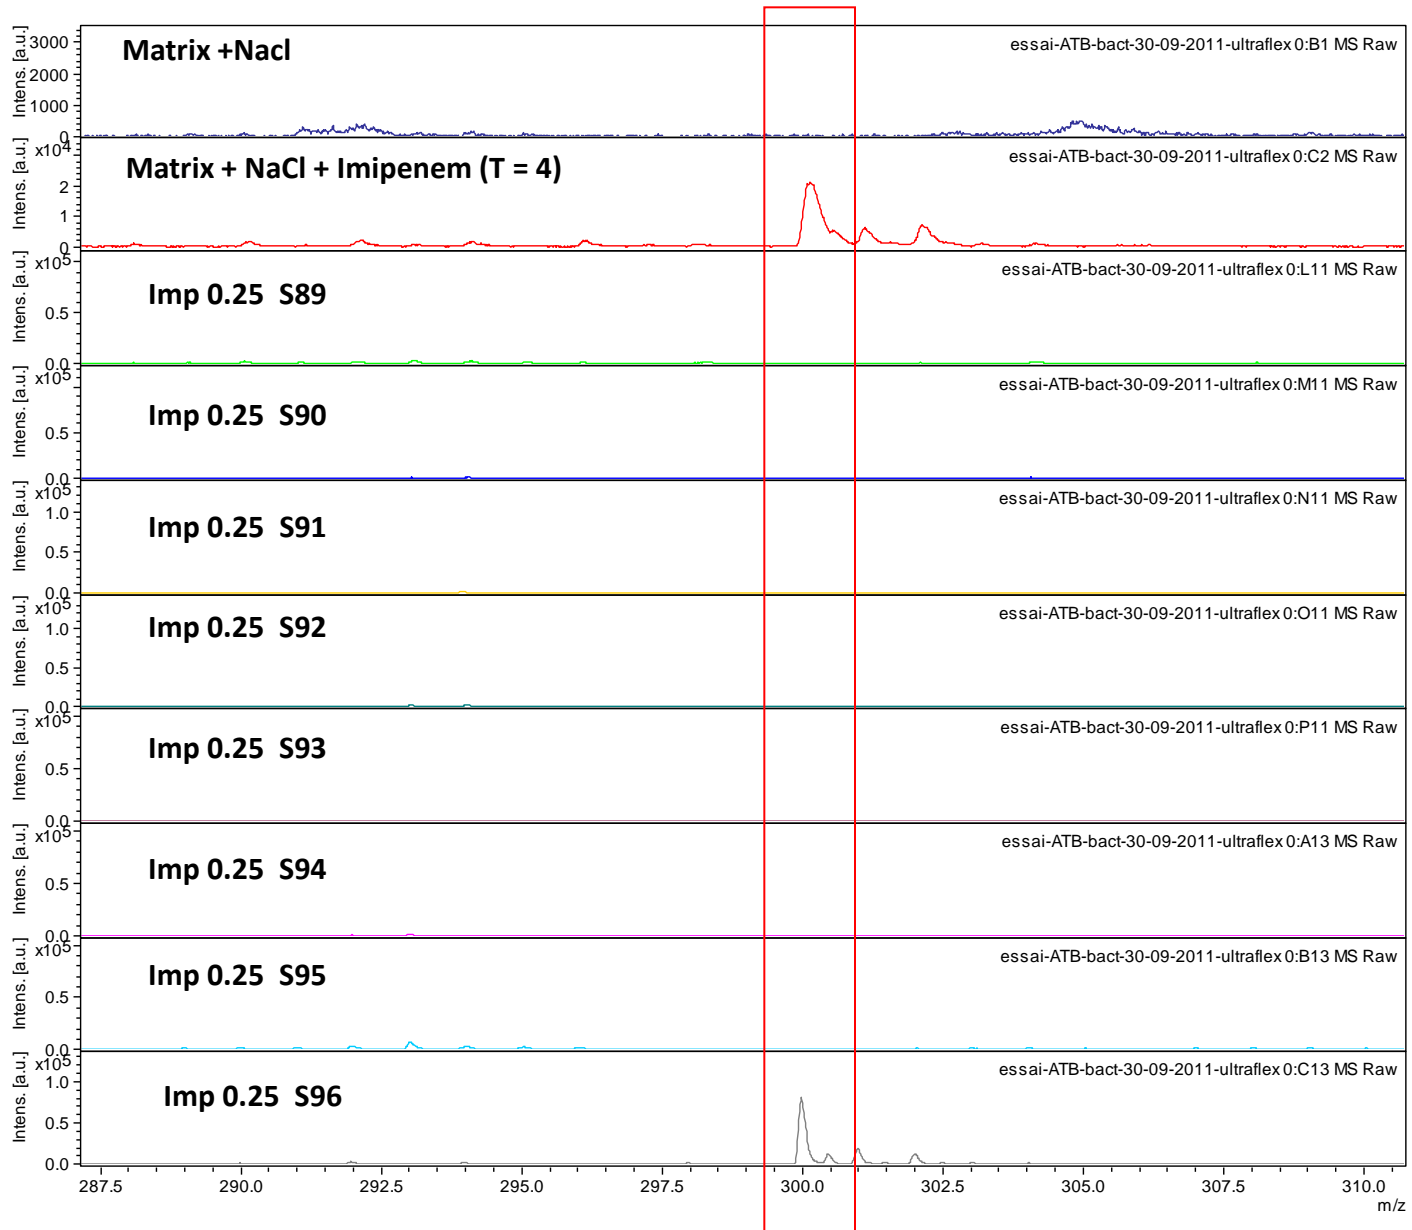

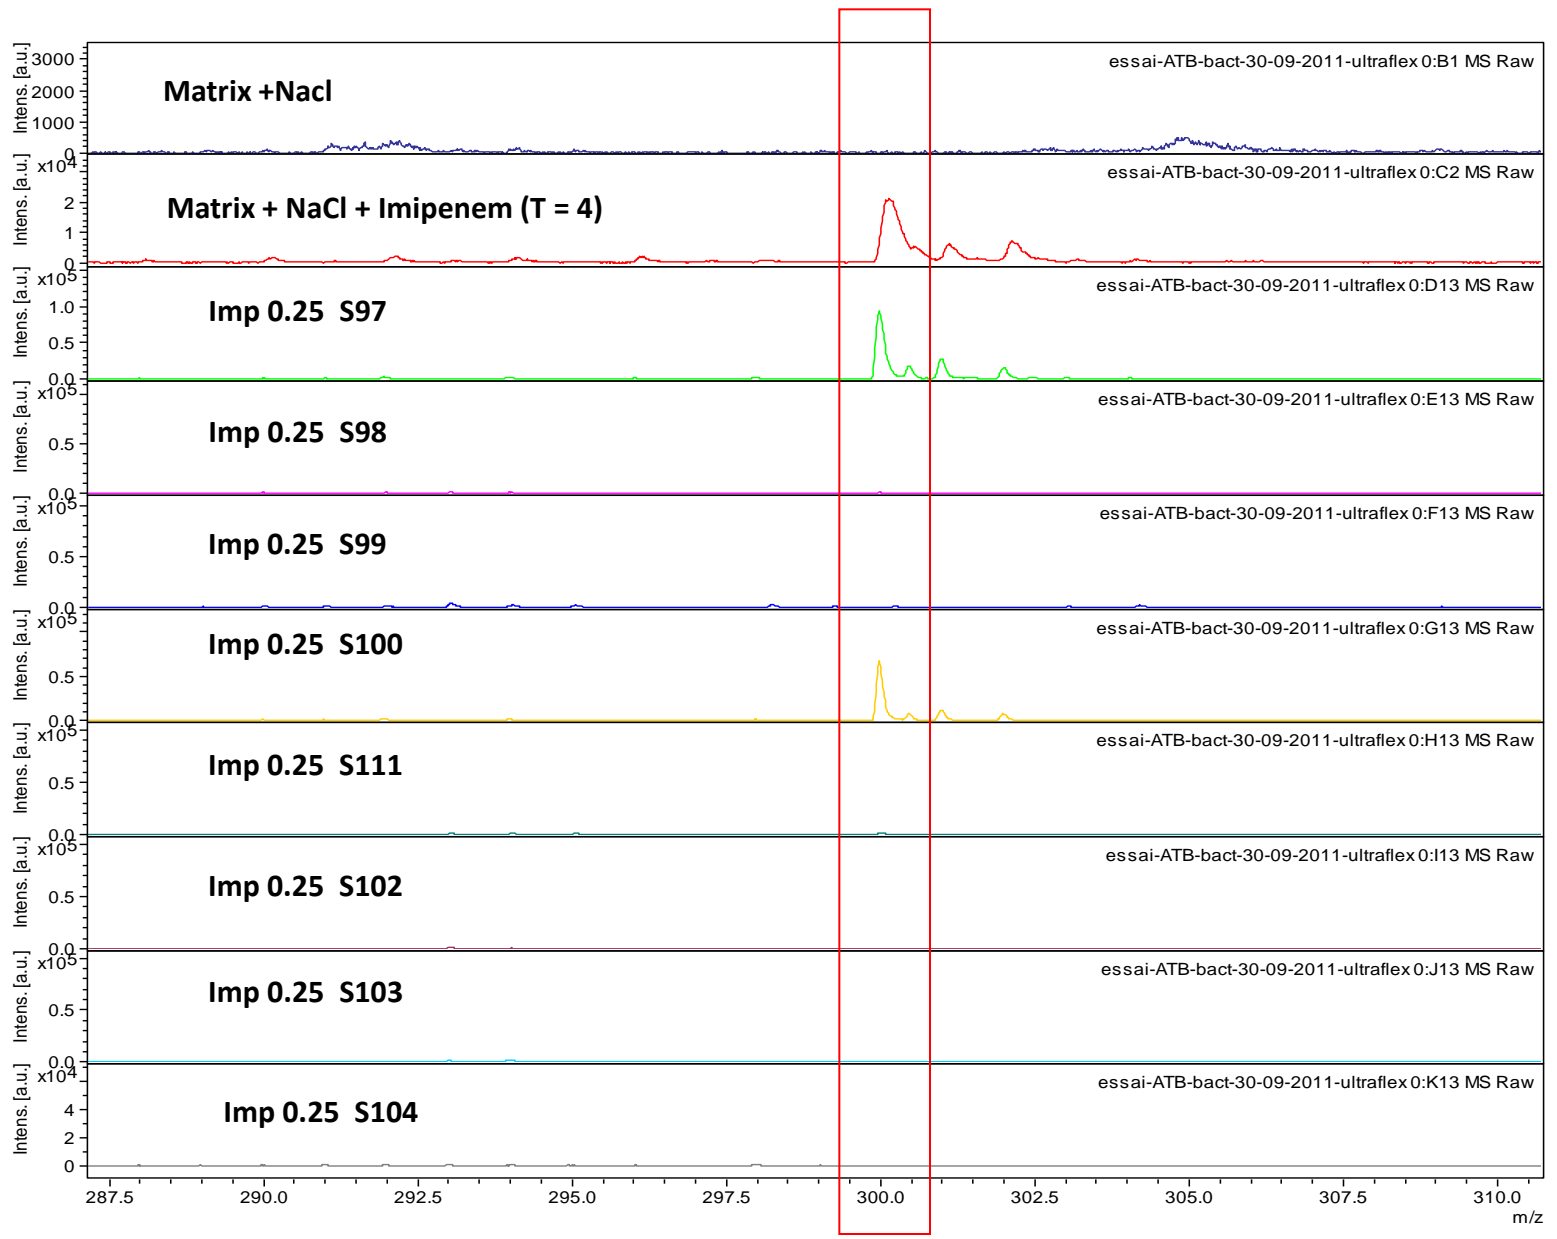

Supplement: pone.0031676.s002.pdf [file pone.0031676.s002.pdf]
